# Supplementary material for: Person‐specific differences in ubiquitin‐proteasome mediated proteostasis in human neurons
Source: PubMed Central journal article supplement — Alzheimers Dement. 2024 Mar 12;20(4):2952–67. doi: 10.1002/alz.13680 (PMC11032531; doi:10.1002/alz.13680), 2024-03-12
Supplement: ALZ-20-2952-s001.pdf [file ALZ-20-2952-s001.pdf]

# Supplemental Figure 5.

A

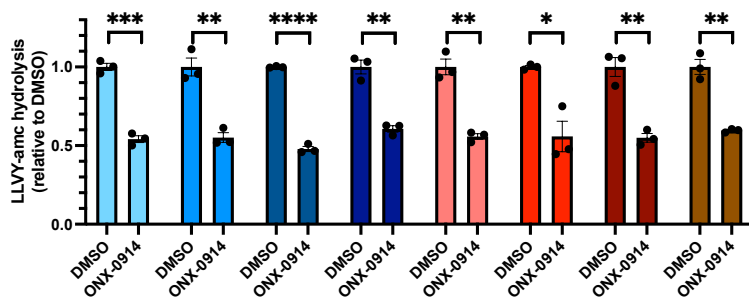

B

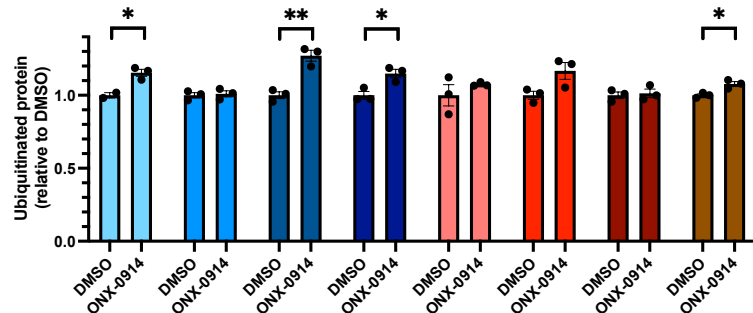

C

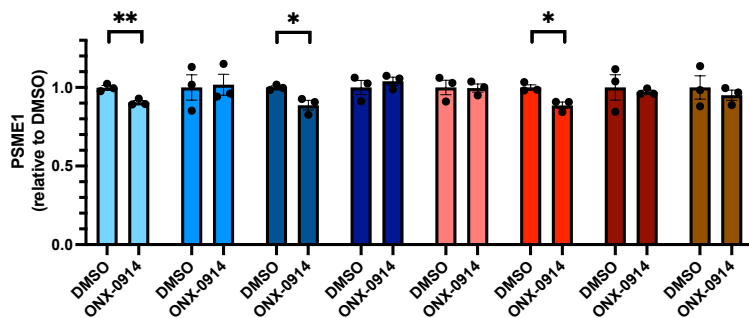

D

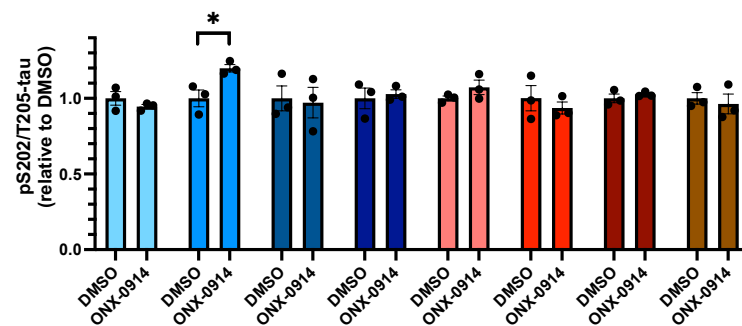

E

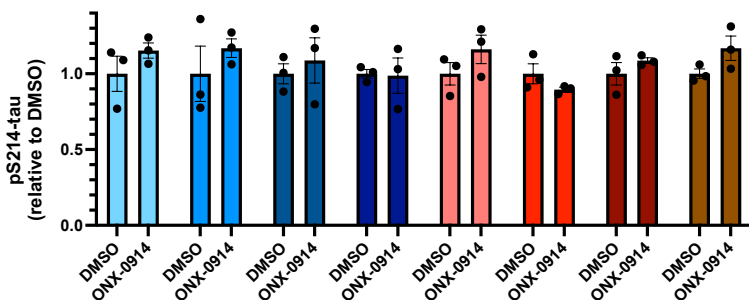

F

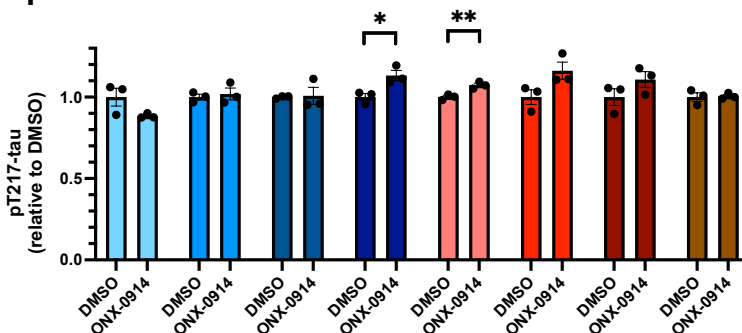

BR33 BR65 BR01 BR09 BR107 BR66 BR90 BR98

## Supplemental Figure 5. Characterization of the ROSMAP iNs treated with 50 nM ONX-0914 for 72 hours.

(A-C) Bar graph of (A) proteasome activities (Suc-LLVY-amc hydrolysis), (B) pan-ubiquitinated protein level, and (C) PSME1 protein level in the ROSMAP iNs treated with ONX-0914 or vehicle control (DMSO). (D-F) Bar graphs of (D) High molecular weight (HMW)-pS202/T205-tau, (E) HMW-pS214-tau, and (F) HMW-pT217-tau in the ROSMAP iNs treated with ONX-0914 or vehicle control (DMSO). Error bars denote mean±SEM. Statistical analysis used unpaired t-tests. \*,  $p < 0.05$ ; \*\*,  $p < 0.01$ ; \*\*\*,  $p < 0.001$ ; \*\*\*\*,  $p < 0.0001$ ,  $N = 3$ .
