# Supplementary material for: Person‐specific differences in ubiquitin‐proteasome mediated proteostasis in human neurons
Source: PubMed Central journal article supplement — Alzheimers Dement. 2024 Mar 12;20(4):2952–67. doi: 10.1002/alz.13680 (PMC11032531; doi:10.1002/alz.13680), 2024-03-12
Supplement: ALZ-20-2952-s002.pdf [file ALZ-20-2952-s002.pdf]

# Supplemental Figure 3.

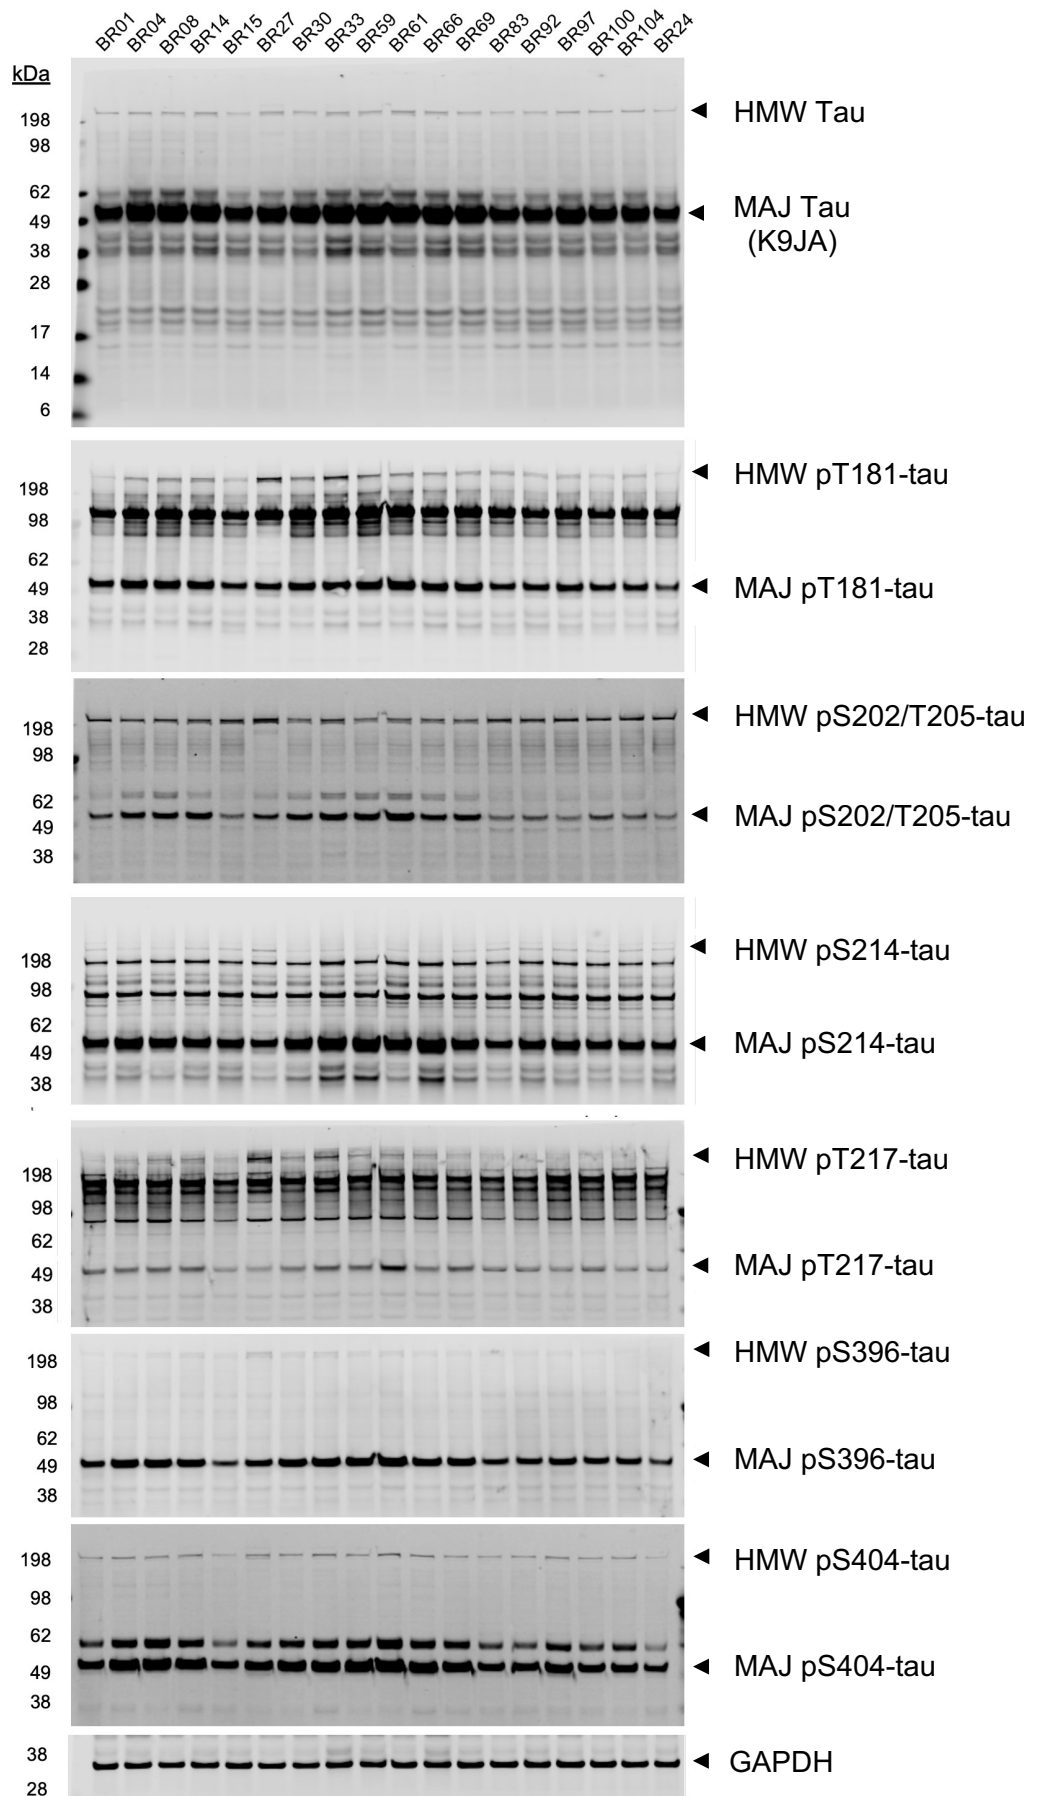

## Supplemental Figure 3. Representative western blots of phospho-tau in ROSMAP iNs.

Example western blots stained for the major forms of 50-60 kDa (MAJ) tau and the high molecular weight (HMW) form of aggregated tau stained by the antibody recognizing: total tau (K9JA), pT181-tau, pS202/T205-tau, pS214-tau, pT217-tau, pS396-tau, and pS404-tau. GAPDH serves as loading control.
