# Supplementary material for: Person‐specific differences in ubiquitin‐proteasome mediated proteostasis in human neurons
Source: PubMed Central journal article supplement — Alzheimers Dement. 2024 Mar 12;20(4):2952–67. doi: 10.1002/alz.13680 (PMC11032531; doi:10.1002/alz.13680), 2024-03-12
Supplement: ALZ-20-2952-s005.pdf [file ALZ-20-2952-s005.pdf]

# Supplemental Figure 1

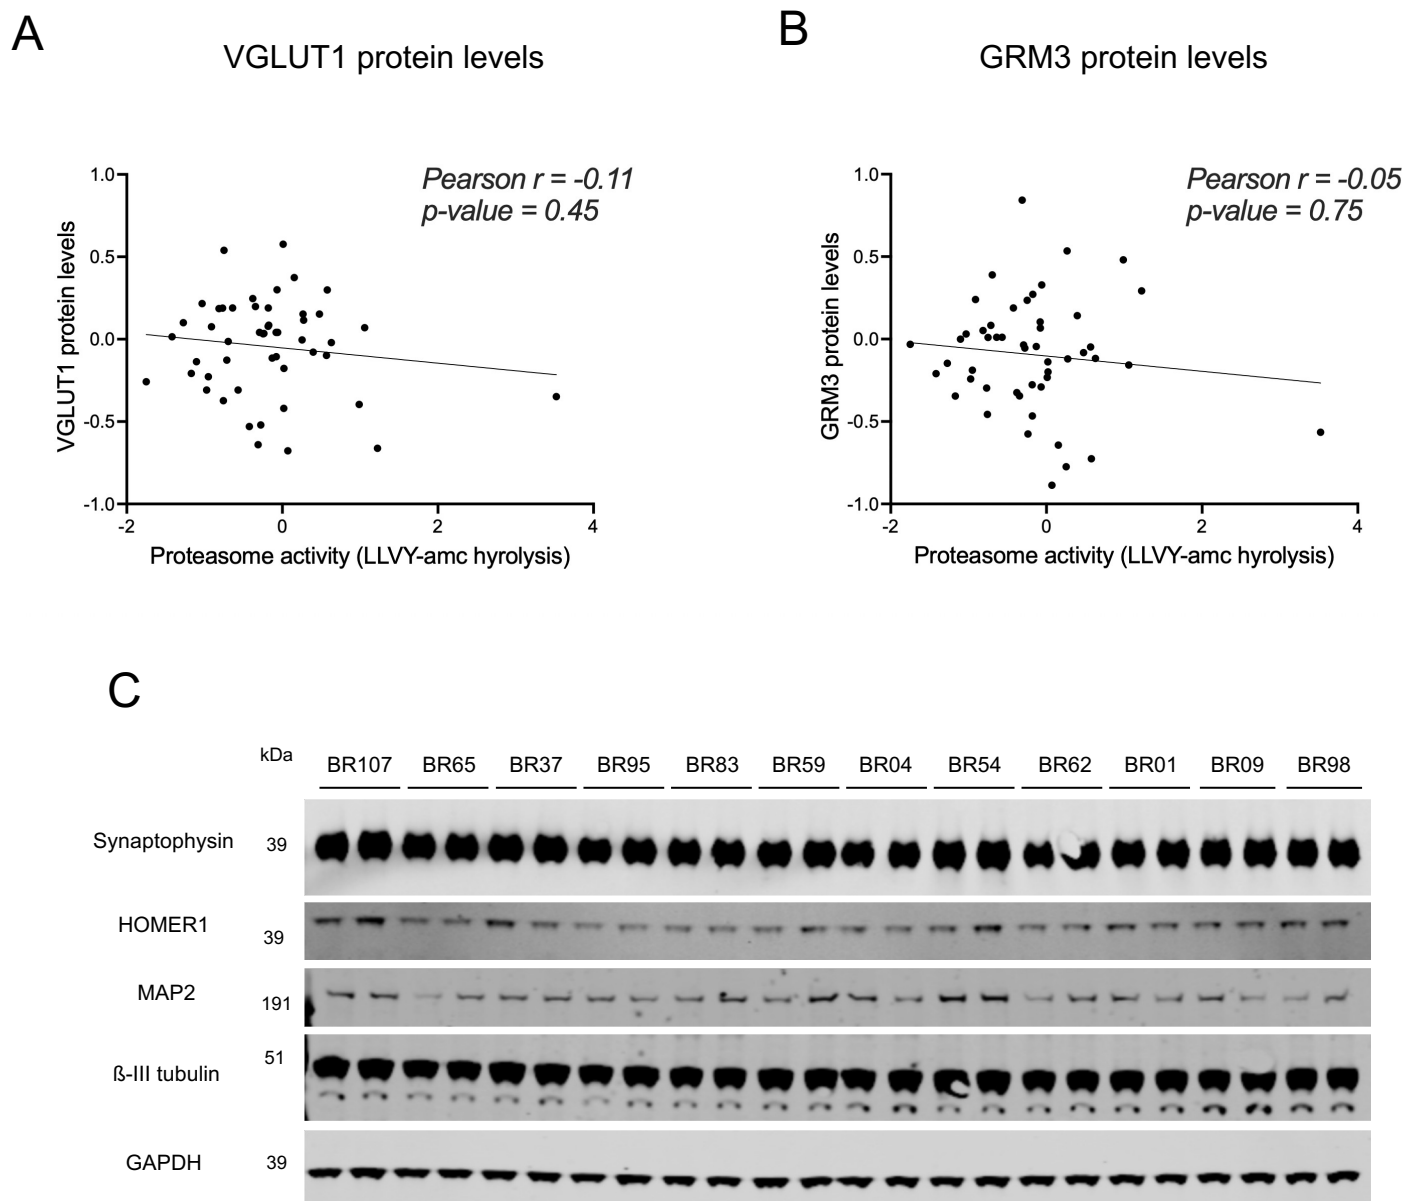

**Supplemental Figure 1. Protein expression of glutamatergic neuronal markers in ROSMAP iNs.** (A-B) Scatter plot of the abundance of (A) VGLUT1 and (B) GRM3, glutamatergic neuronal markers, in protein lysates from iNs versus proteasome activity at baseline. (C) Western blots stained for synaptophysin, HOMER1, MAP2, and  $\beta$ -III tubulin in protein lysates from 12 ROSMAP iNs. GAPDH serves as loading control.
